# Supplementary material for: Poly(thiolactone) homo- and copolymers from maleimide thiolactone: synthesis and functionalization
Source: Royal Society of Chemistry journal article supplement (doi:10.1039/c5py00329f), 2015-01-01
Supplement: c5py00329f1.pdf [file c5py00329f1.pdf]

## Supporting information

# Poly(thiolactone) Homo- and Copolymers from Maleimide Thiolactone: Synthesis and Functionalization

Tobias Rudolph,<sup>1,2</sup> Pieter Espeel,<sup>3</sup> Filip E. Du Prez,<sup>3,\*</sup> Felix H. Schacher<sup>1,2,\*</sup>

[1] Laboratory of Organic and Macromolecular Chemistry, Friedrich Schiller University Jena,  
Humboldtstr. 10, 07743 Jena, Germany

E-mail: [felix.schacher@uni-jena.de](mailto:felix.schacher@uni-jena.de)

[2] Jena Center for Soft Matter (JCSM), Friedrich Schiller University Jena, Philosophenweg 7,  
07743 Jena, Germany

[3] Polymer Chemistry Research Group, Department of Organic and Macromolecular Chemistry,  
Ghent University, Krijgslaan 281 S4-bis, B-9000 Gent, Belgium

E-mail: [filip.duprez@ugent.be](mailto:filip.duprez@ugent.be)

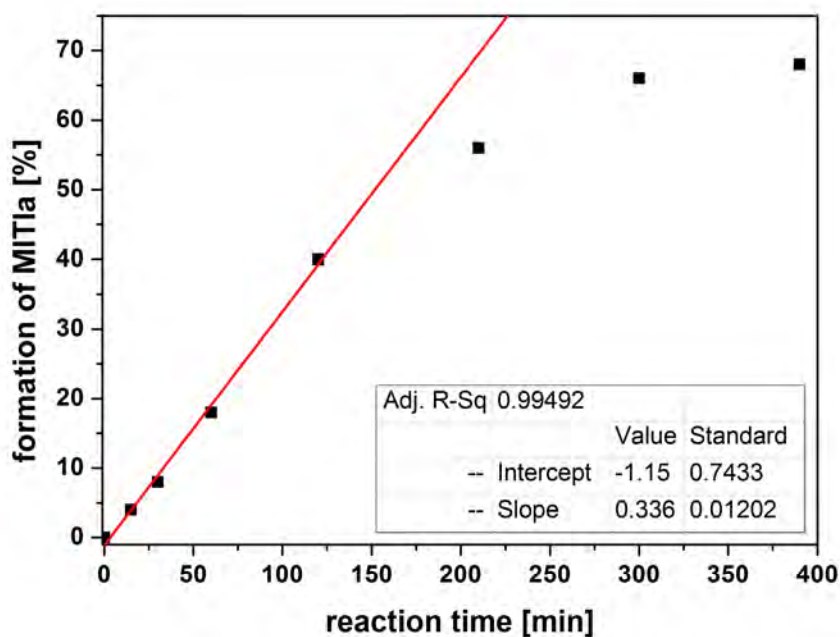

Figure S1: Kinetic investigation of the synthesis of MITIa comparing the newly formed thiolactone signal at 4.95 ppm (DMSO- $d_6$ ) to trioxane as internal standard at 70 °C.

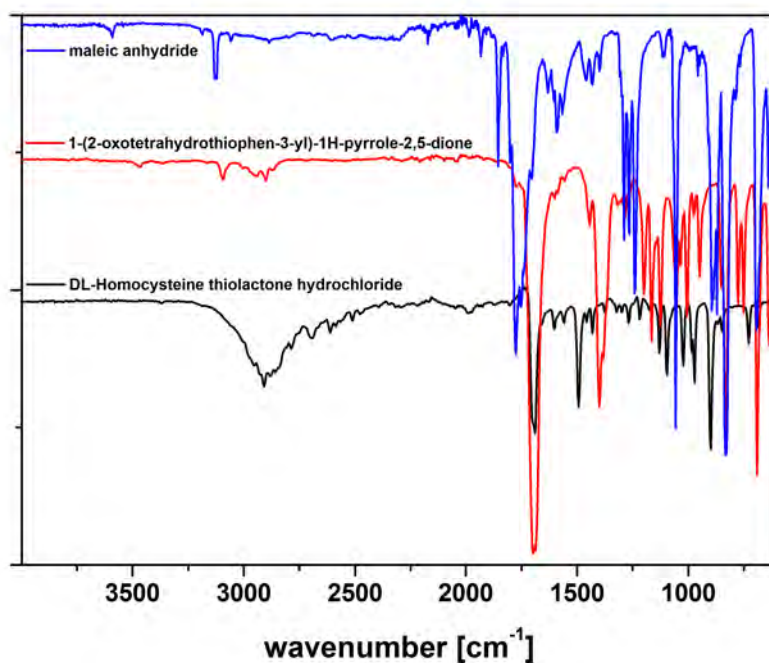

Figure S2: Comparison of FT-IR spectra for maleic anhydride (blue trace-), DL-homocysteine thiolactone hydrochloride (black trace), and the desired maleimide thiolactone (IUPAC: 1-(2-oxotetrahydrothiophen-3-yl)-1H-pyrrole-2,5-dione; MITIa, red trace).

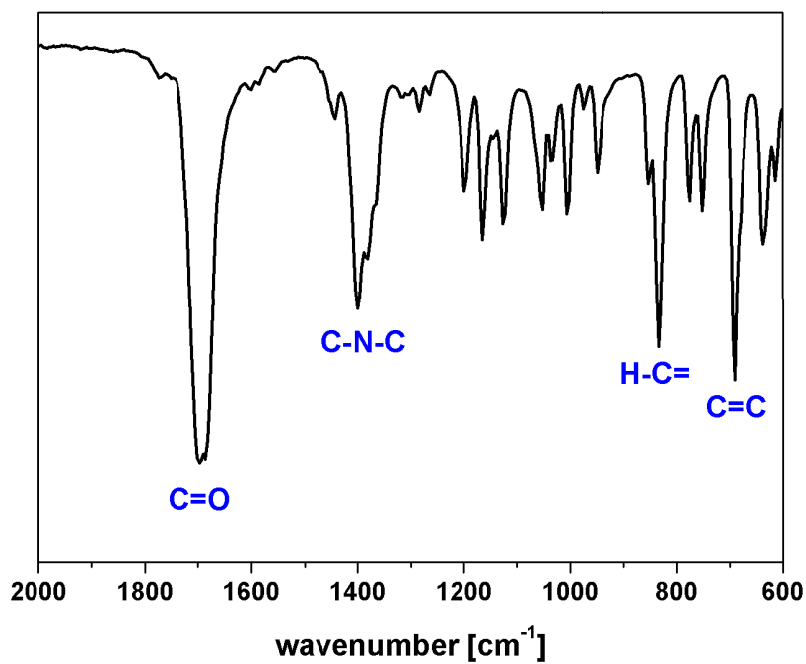

Figure S3: Enlarged FT-IR spectrum for MITla and the important signals for: carbonyls at 1689, C-N-C at 1400, and the maleimide double bond at 830 and 690 cm<sup>-1</sup>.

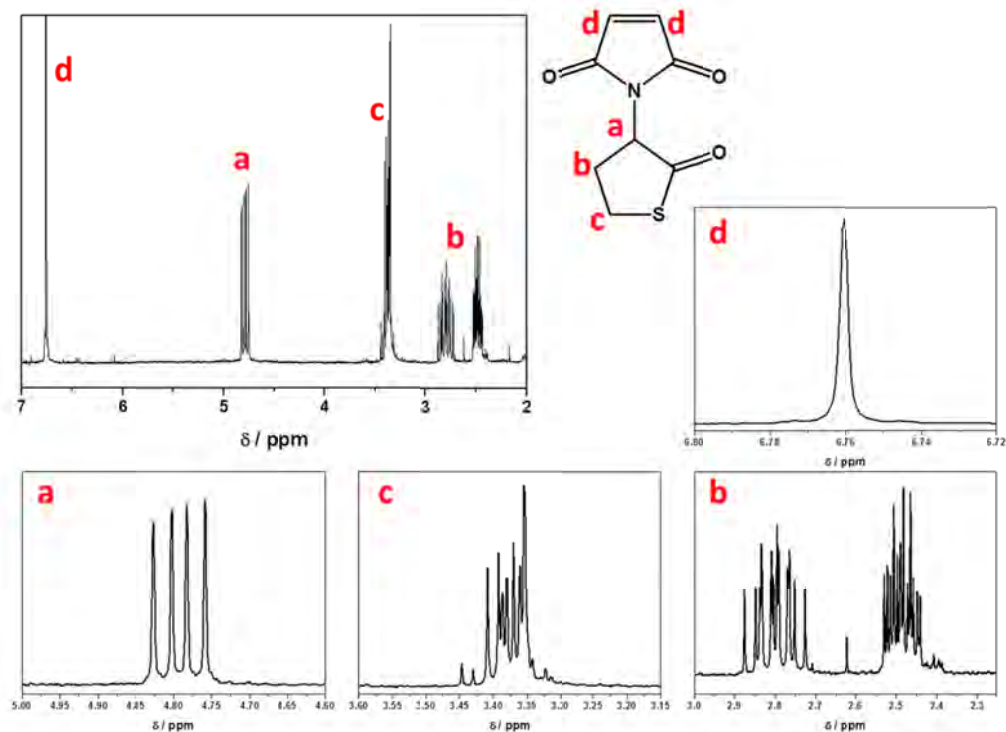

Figure S4: <sup>1</sup>H-NMR spectra of maleimide thiolactone (MITla) and peak assignment (CDCl<sub>3</sub>, 300 MHz).

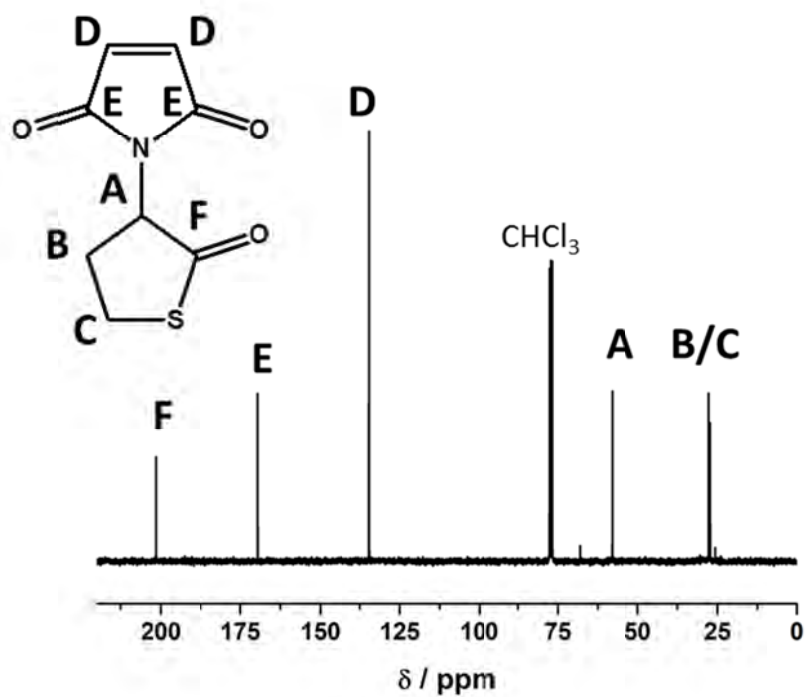

Figure S5:  $^{13}\text{C}$ -NMR spectrum of maleimide thiolactone (MITla) ( $\text{CDCl}_3$ , 75 MHz).

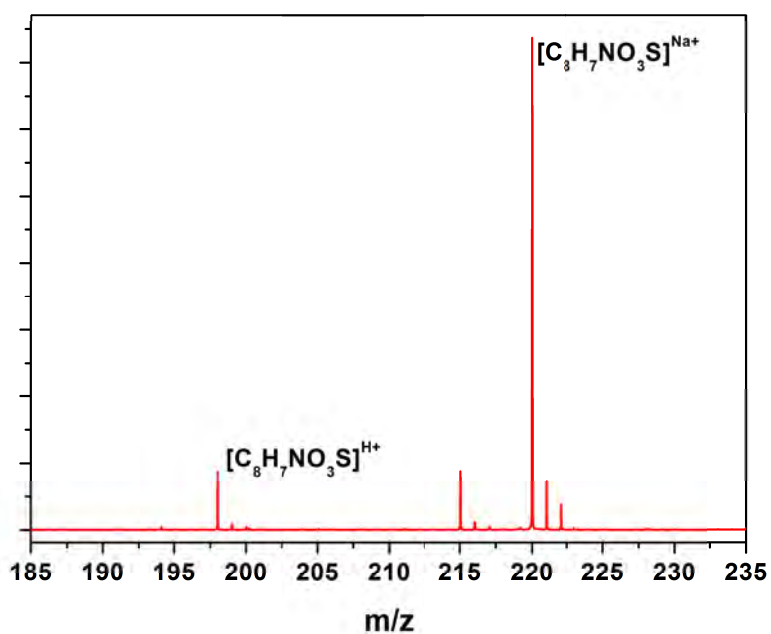

Figure S6: ESI-MS spectrum for MITla.

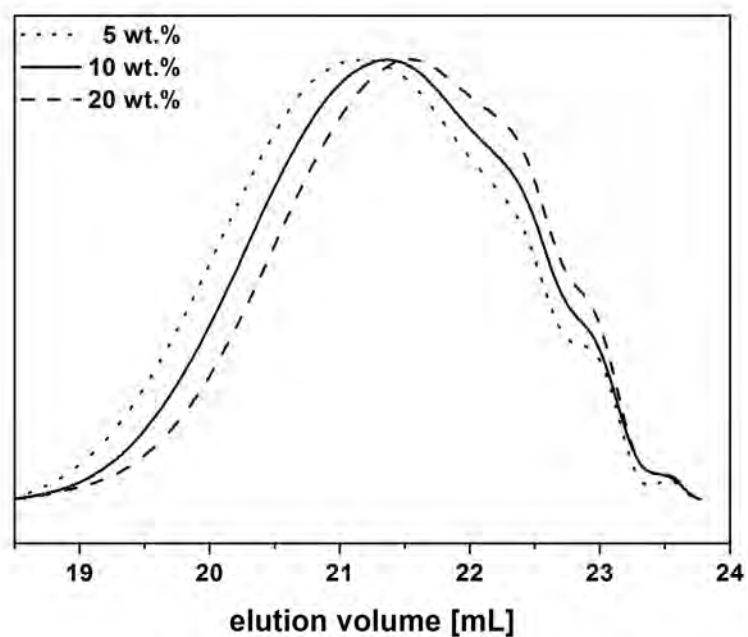

Figure S7: Comparison of SEC traces for the homopolymerization of MITIa initiated by different amounts of TPO in solution ( $100 \text{ mg mL}^{-1}$  DCM): 5 wt.% (dotted line), 10 wt.% (straight line), and 20 wt.% (dashed line).

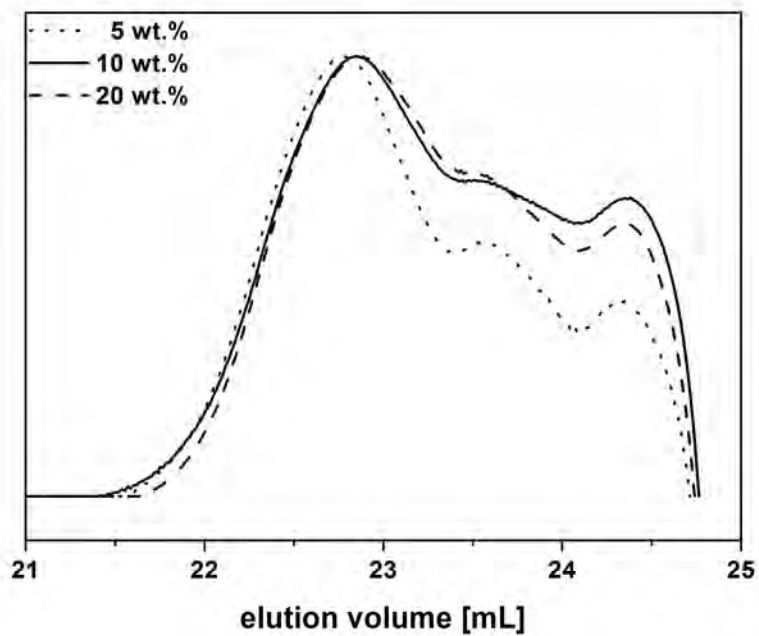

Figure S8: Comparison of SEC traces for the homopolymerization of MITIa initiated by different amounts of AIBN in solution ( $100 \text{ mg mL}^{-1}$  THF): 5 wt.% (dotted line), 10 wt.% (straight line), and 20 wt.% (dashed line).

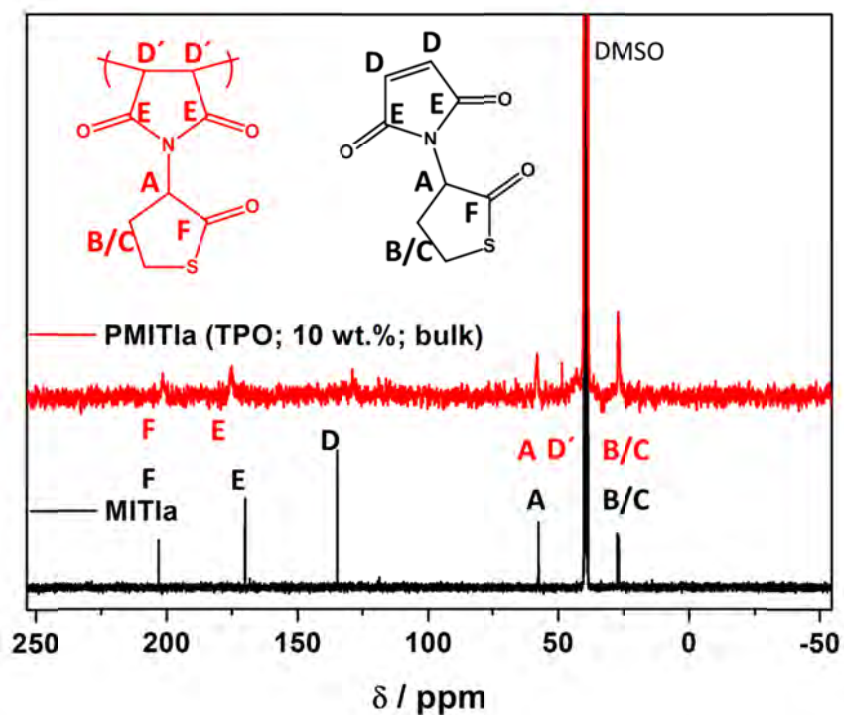

Figure S9: Comparison of  $^{13}\text{C}$ -NMR traces for MITIa (black trace) and PMITIa (10 wt.% TPO, bulk; red trace) ( $\text{DMSO-}d_6$ , 75 MHz).

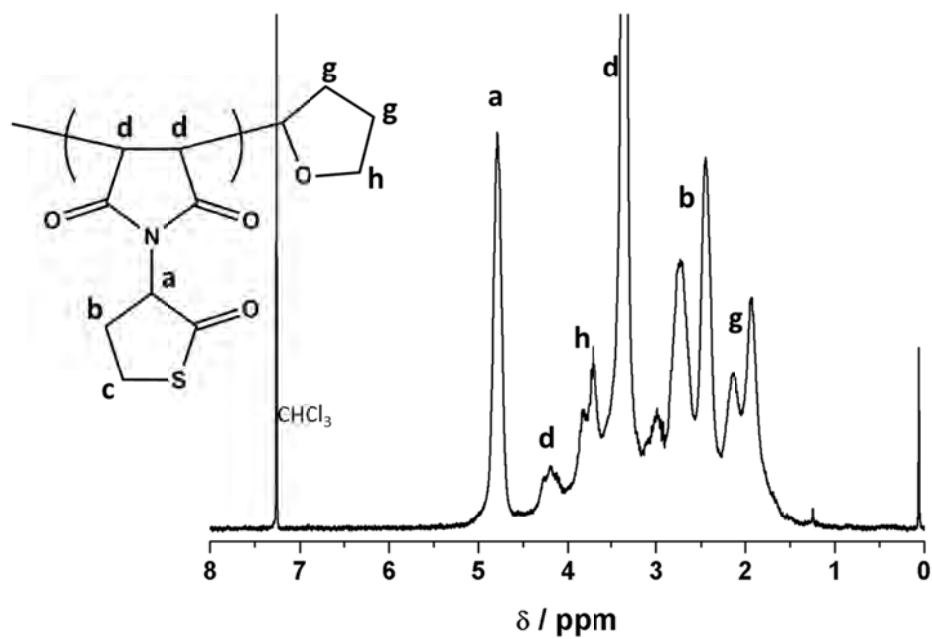

Figure S10: NMR spectrum for  $\text{PMITIa}^{\text{AIBN}}$  initiated by AIBN in THF ( $\text{CDCl}_3$ , 300 MHz).



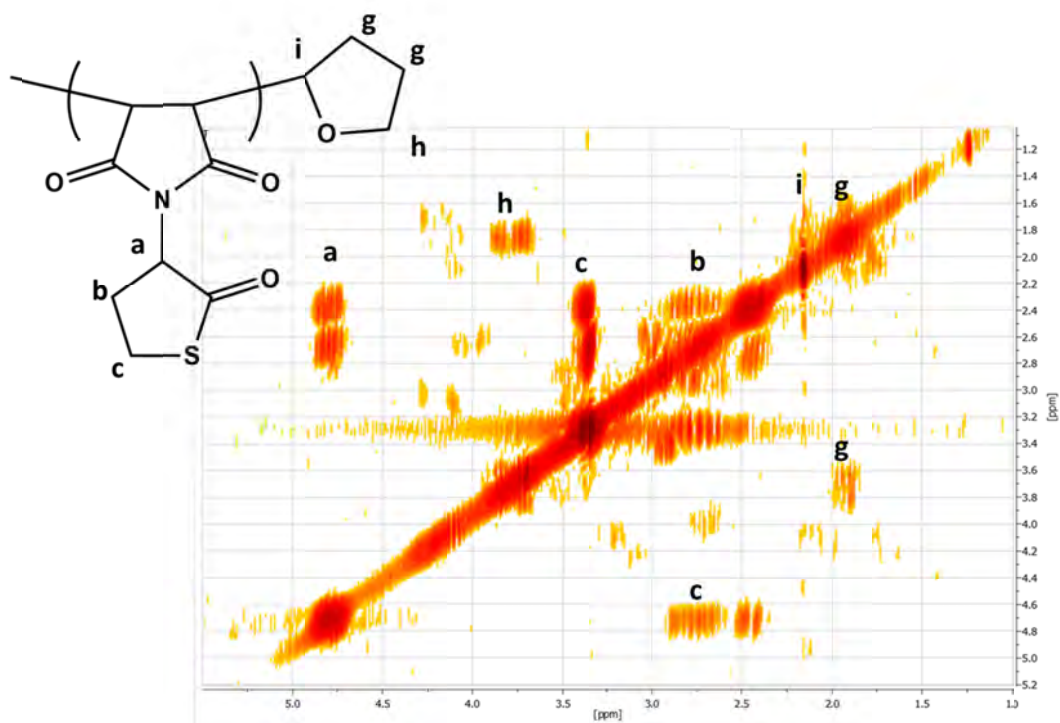

Figure S13: COSY spectrum for PMITla<sup>AIBN</sup> initiated *via* AIBN in THF (300 MHz; CDCl<sub>3</sub>).

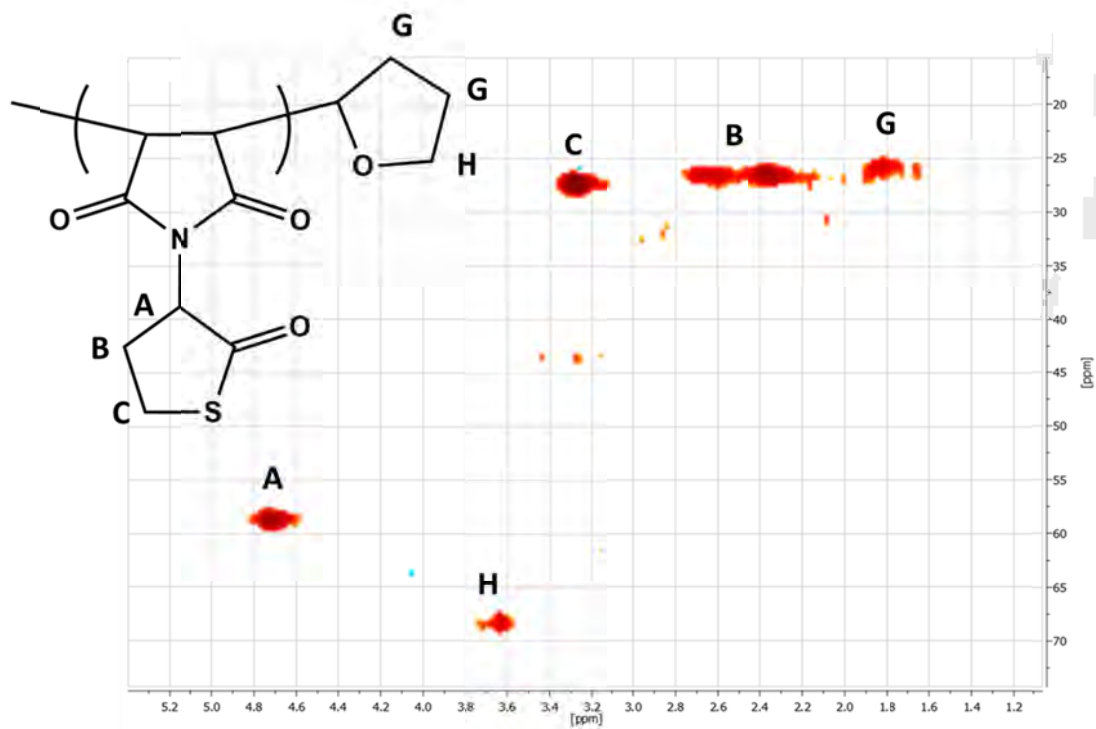

Figure S14: HSQC NMR spectrum for PMITla<sup>AIBN</sup> initiated *via* AIBN in THF (300 MHz; CDCl<sub>3</sub>).



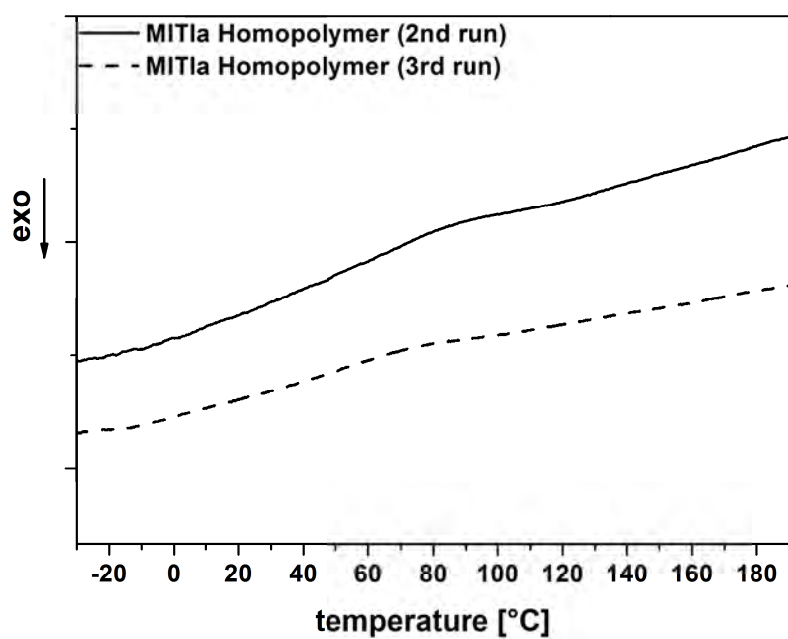

Figure S15: DSC thermogram for PMITla<sup>TPO</sup> in the temperature range of -30 to 200°C.

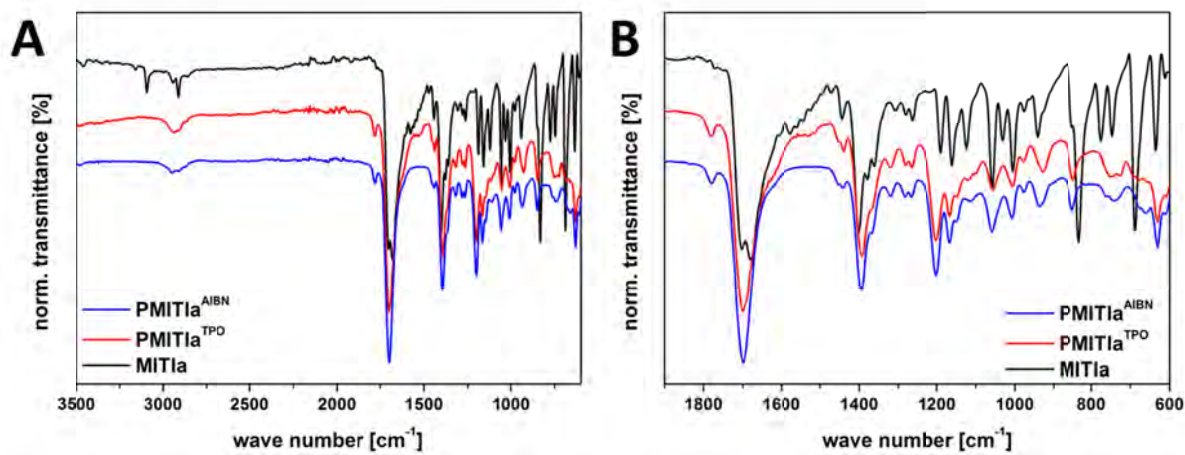

Figure S16: Comparison of FT-IR traces for PMITla<sup>AIBN</sup> (red trace) and PMITla<sup>TPO</sup> (black trace) (A) and an enlargement of the fingerprint region (B).

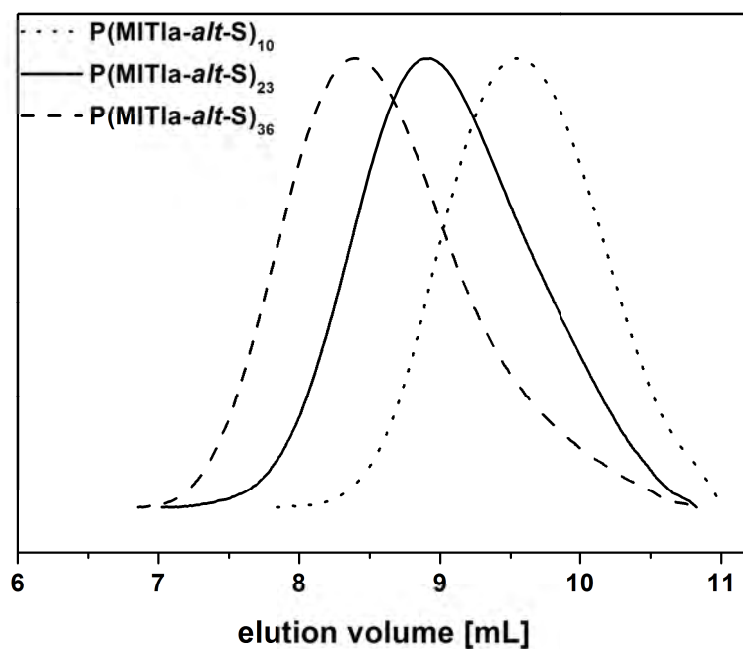

Figure S17: Comparison of SEC traces for P(MITla-*alt*-S)<sub>10</sub> (dotted line), P(MITla-*alt*-S)<sub>23</sub> (straight line), and P(MITla-*alt*-S)<sub>36</sub> (dashed line).

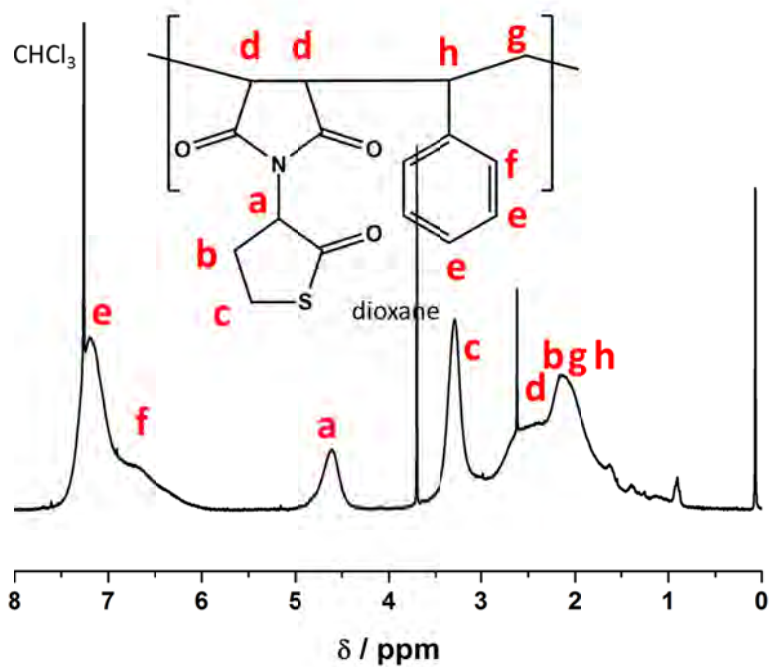

Figure S18: <sup>1</sup>H-NMR spectrum for P(MITla-*alt*-S)<sub>23</sub> and peak assignment (300 MHz; CDCl<sub>3</sub>).

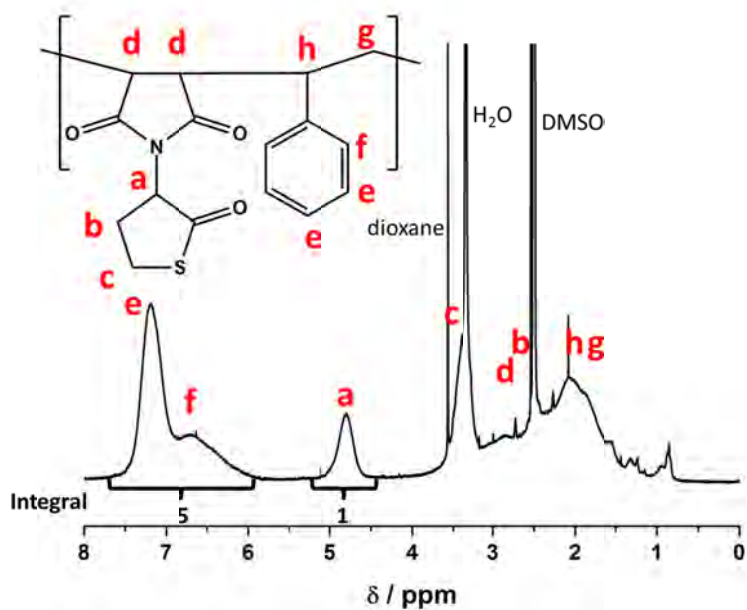

Figure S19:  $^1\text{H}$ -NMR spectrum for  $\text{P}(\text{MITla-}i\text{alt-S})_{23}$  and peak assignment (300 MHz;  $\text{DMSO-}d_6$ ).

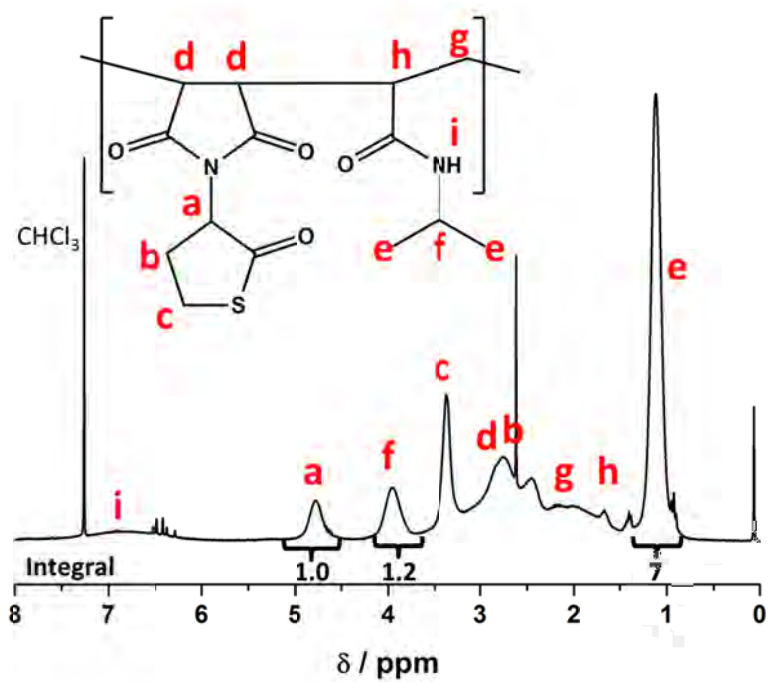

Figure S20:  $^1\text{H}$ -NMR spectrum for  $\text{P}(\text{MITla-co-NIPAAm})_{23}$  and peak assignment (300 MHz;  $\text{CDCl}_3$ ).

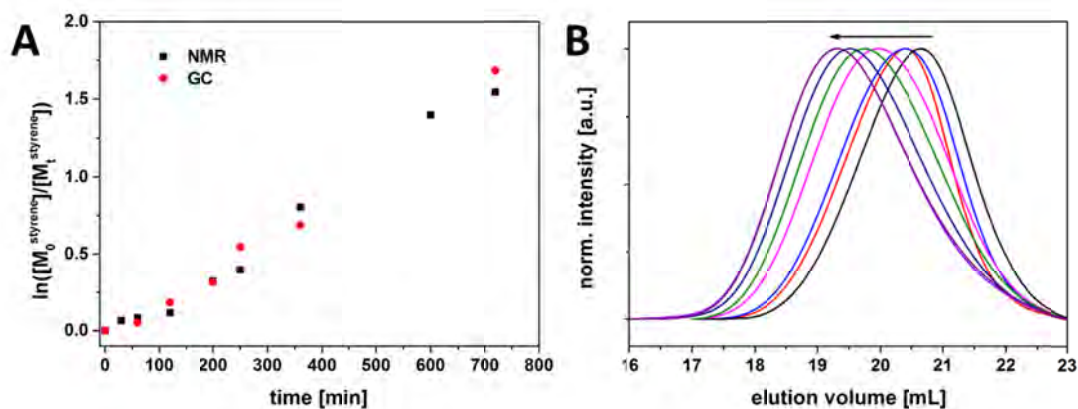

Figure S21: A) Time vs. styrene monomer conversion plot determined by NMR (black square) and GC (red dot) for the copolymerization of MITIa and styrene; B) comparison of SEC traces for the kinetic investigation of the copolymerization of MITIa and styrene using RAFT.

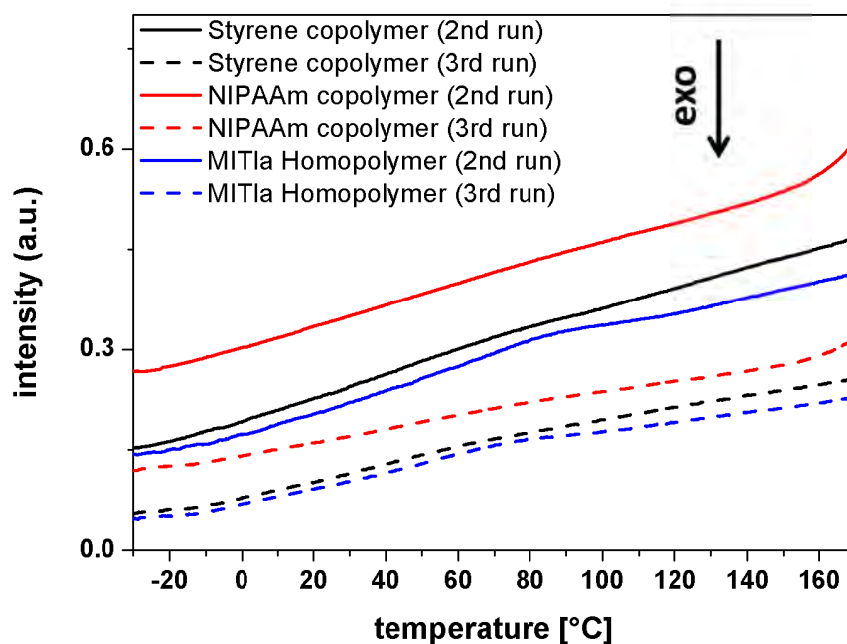

Figure S22: Comparison of DSC traces for P(MITIa-*alt*-S)<sub>23</sub> (black lines), P(MITIa-*co*-NIPAAm)<sub>23</sub> (red lines) and PMITIA<sup>TPO</sup> (blue lines) in the second (straight lines) and third (dashed lines) heating run.

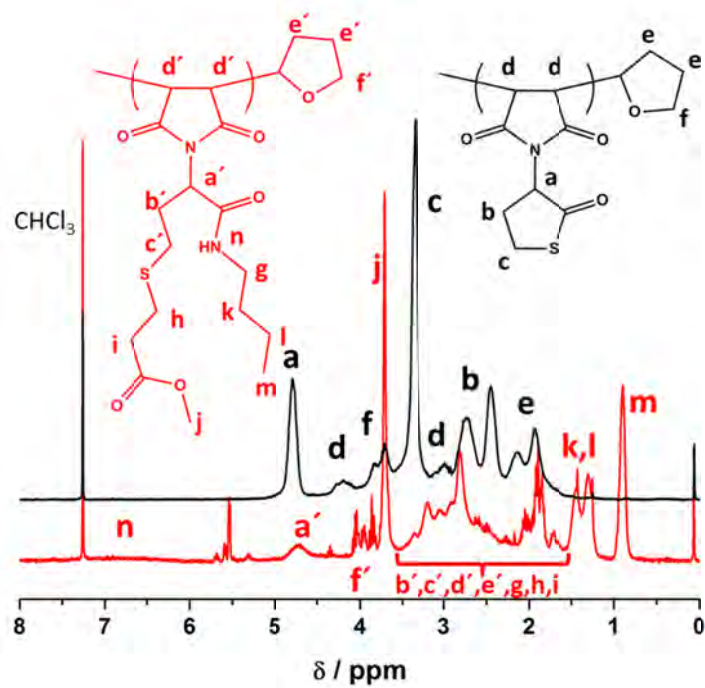

Figure S23: Comparison of NMR spectra for PMITla<sup>AIBN</sup> before (black trace) and after (red trace) double modification via *n*-butylamine and methyl acrylate (300 MHz; CDCl<sub>3</sub>).

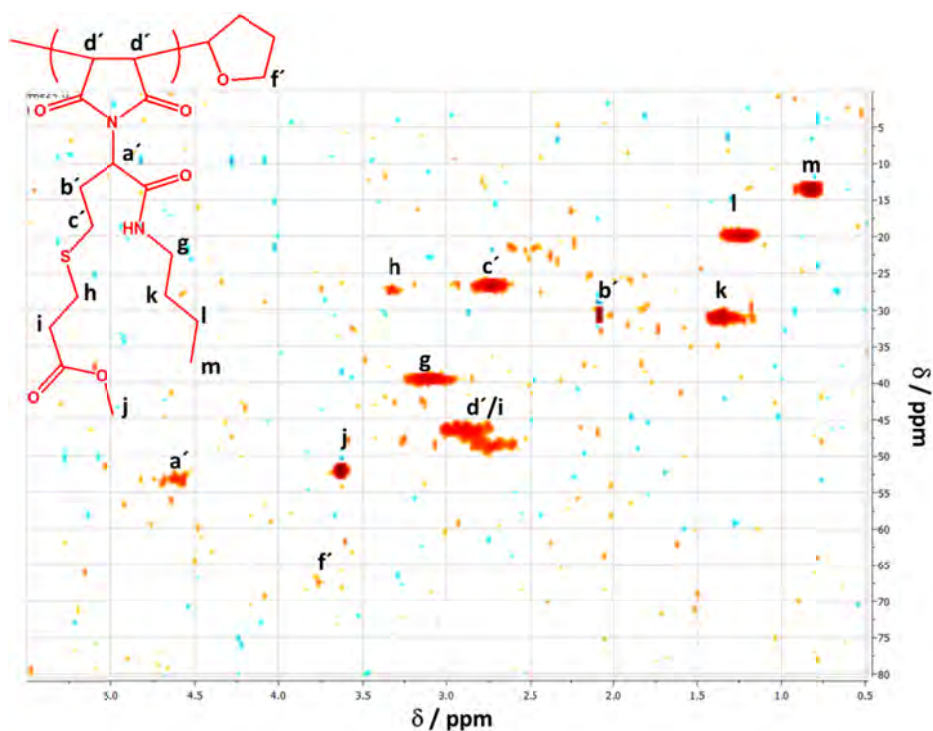

Figure S24: HSQC NMR spectra for PMITla<sup>AIBN,DM</sup> initiated via AIBN in CHCl<sub>3</sub> by methyl acrylate and *n*-butylamine and peak assignment (300 MHz; CDCl<sub>3</sub>).

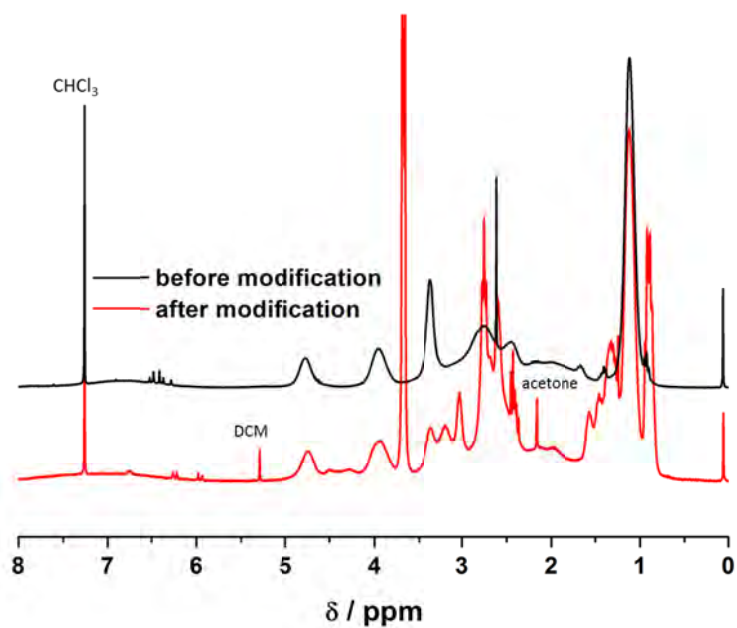

Figure S25: Comparison of NMR traces for  $\text{P}(\text{MITla-co-NIPAAm})_{23}$  before (black trace) and after (red trace) double modification *via n*-butylamine and methyl acrylate (300 MHz;  $\text{CDCl}_3$ ).

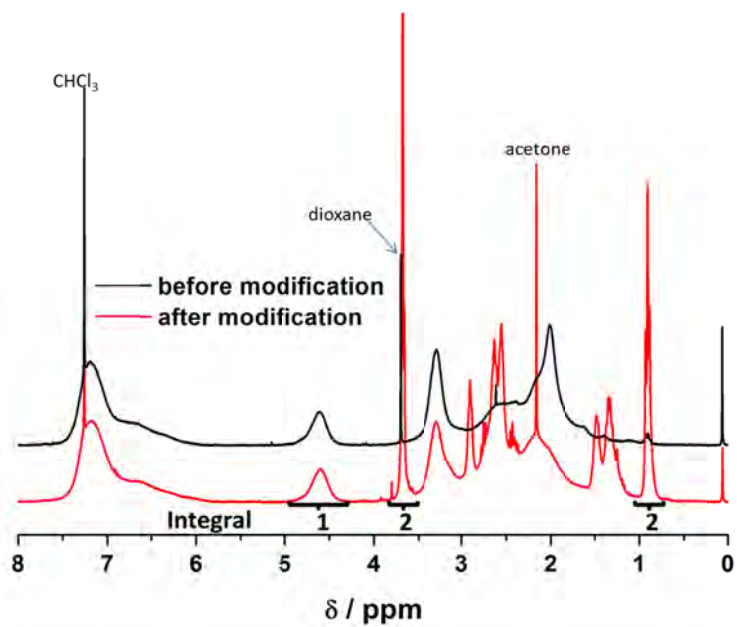

Figure S26: Comparison of NMR traces for  $\text{P}(\text{MITla-alt-S})_{36}$  before (black trace) and after (red trace) double modification *via n*-butylamine and methyl acrylate (300 MHz;  $\text{CDCl}_3$ ).



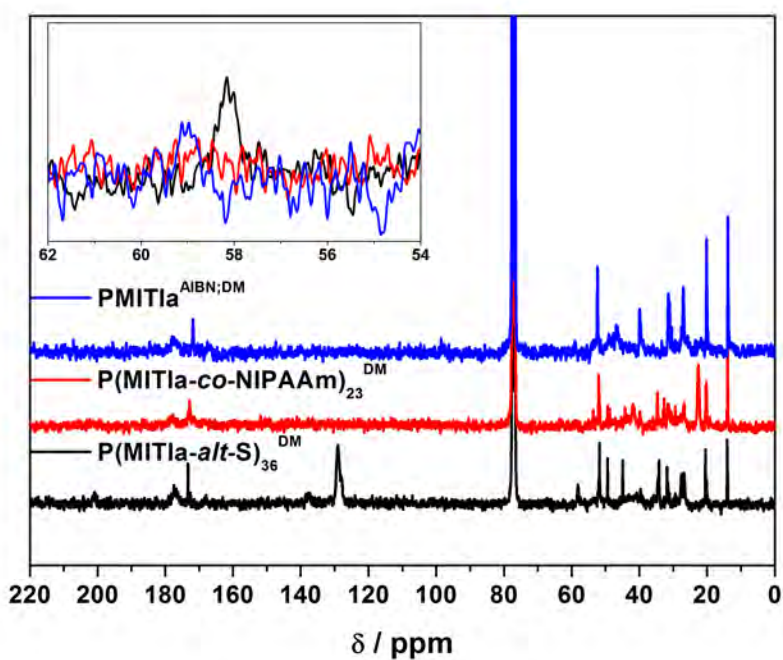

Figure S27: Comparison of  $^{13}\text{C}$ -NMR traces for  $\text{PMITla}^{\text{AIBN,DM}}$  (blue trace),  $\text{P(MITla-co-NIPAAm)}_{23}^{\text{DM}}$  (red trace), and  $\text{P(MITla-alt-S)}_{36}^{\text{DM}}$  (black trace); inset shows the signal at 58 ppm.

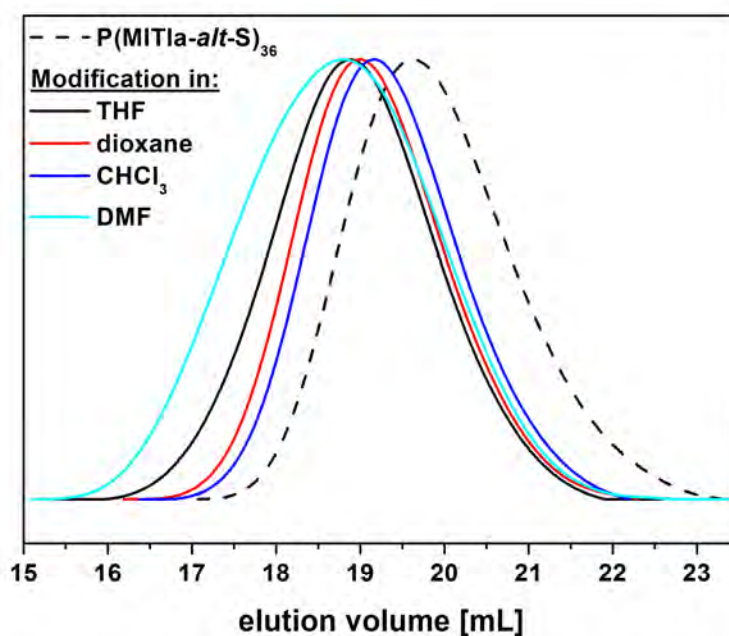

Figure S28: Comparison of SEC traces for the double modification by methyl acrylate and *n*-butylamine for  $\text{P(MITla-alt-S)}_{36}$  in different solvents: pristine  $\text{P(MITla-alt-S)}_{36}$  (dashed line), in THF (black line), in dioxane (red line), chloroform (blue line), DMF (blue line).

Table S1: Double modification of P(MITla-co-S)<sub>36</sub> by *n*-butylamine and methyl acrylate at different conditions (25 mg mL<sup>-1</sup>).

| Solvent    | Reaction Time [h] | Further educt addition after | Estimated degree of functionalization [%] <sup>a</sup> | M <sub>n</sub> <sup>b</sup> [g mol <sup>-1</sup> ] | Đ <sup>b</sup> |
|------------|-------------------|------------------------------|--------------------------------------------------------|----------------------------------------------------|----------------|
| DMF        | 48                | 24 h                         | 40                                                     | 19 600                                             | 1.55           |
| THF        | 48                | 24 h                         | 60                                                     | 18 600                                             | 1.37           |
| Dioxane    | 48                | 24 h                         | 50                                                     | 16 600                                             | 1.30           |
| Chloroform | 48                | 24 h                         | 60                                                     | 15 000                                             | 1.29           |

a) Degree of functionalization is estimated via <sup>1</sup>H-NMR (300 MHz; CDCl<sub>3</sub>)

b) SEC (DMAC/LiCl): PS-calib.

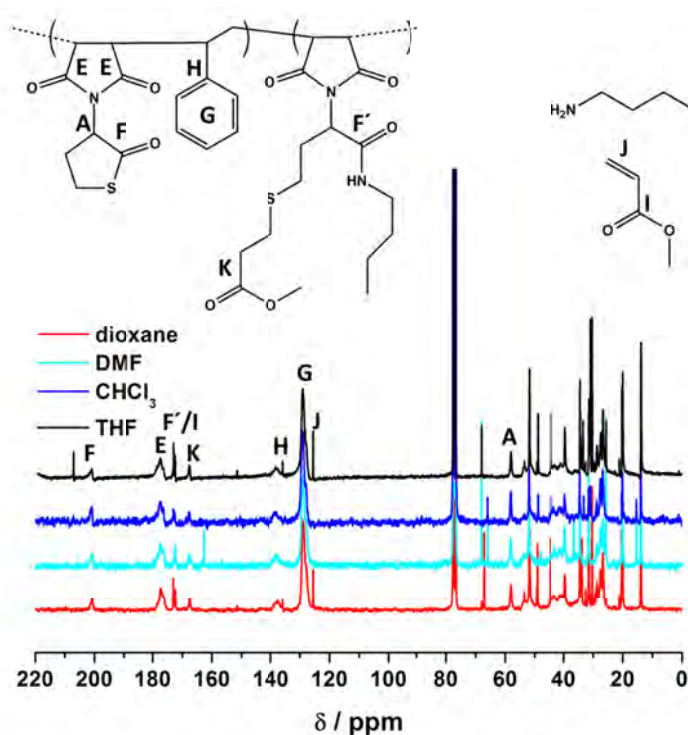

Figure S29: Comparison of <sup>13</sup>C-NMR spectra for double modification by methyl acrylate and *n*-butylamine for P(MITla-*alt*-S)<sub>36</sub> in different solvents: in THF (black line), in dioxane (red line), chloroform (blue line), DMF (blue line) (75 MHz; CDCl<sub>3</sub>); (As polymers were only precipitated once before measuring NMR, educt signals are still observed).



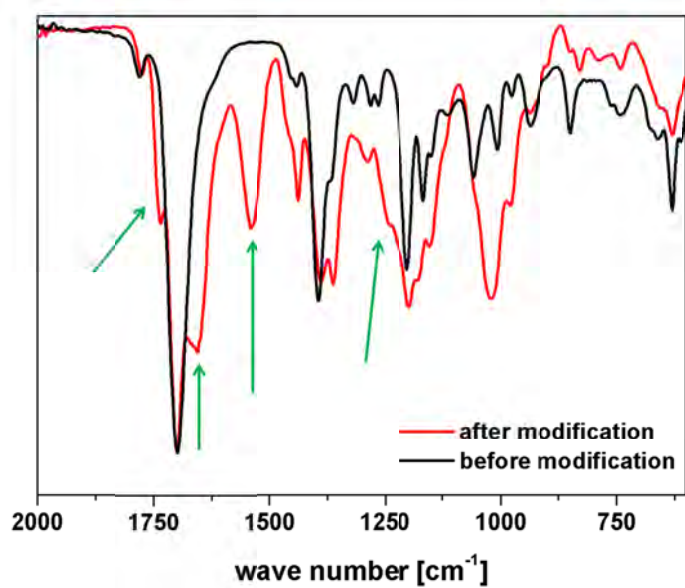

Figure S30: Comparison of FT-IR spectra for PMITla<sup>AIBN</sup> before (black trace) and after (red trace) modification by methyl acrylate and *n*-butylamine.

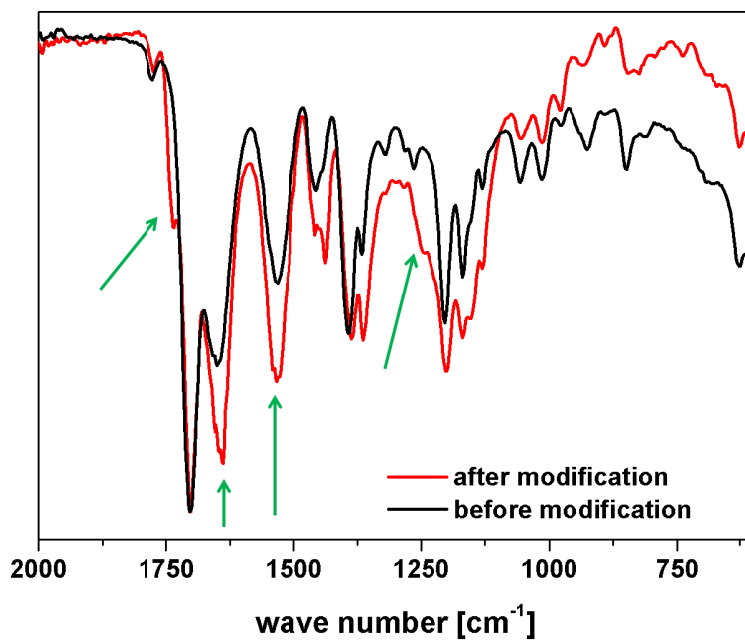

Figure S31: Comparison of FT-IR spectra for P(MITla-co-NIPAAm)<sub>23</sub> before (black trace) and after (red trace) modification by methyl acrylate and *n*-butylamine.

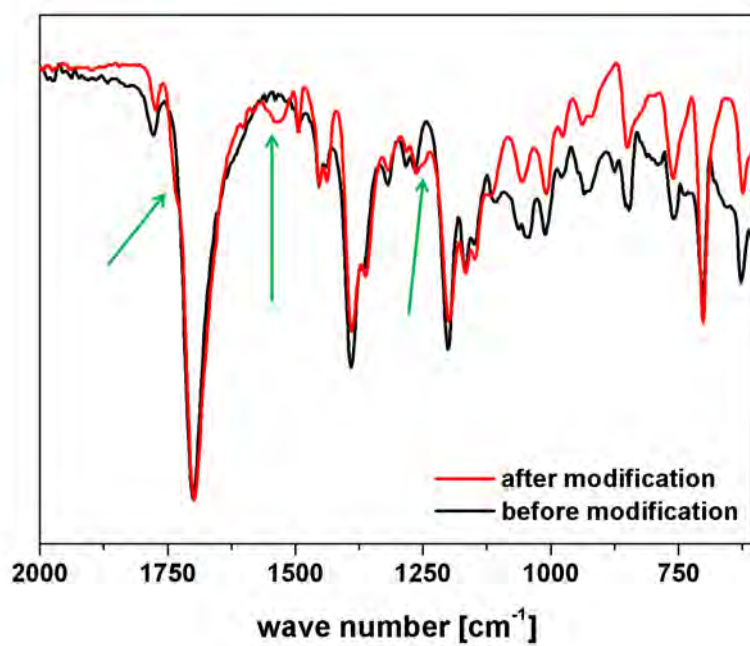

**Figure S32:** Comparison of FT-IR spectra for P(MITla-co-S)<sub>36</sub> before (black trace) and after (red trace) modification by methyl acrylate and *n*-butylamine.
